# Supplementary material
Source: Springer Nature journal article supplement (https://www.springermedizin.de/resource/supplementary/12879_2009_1199_MOESM2_ESM.pdf/9442072)

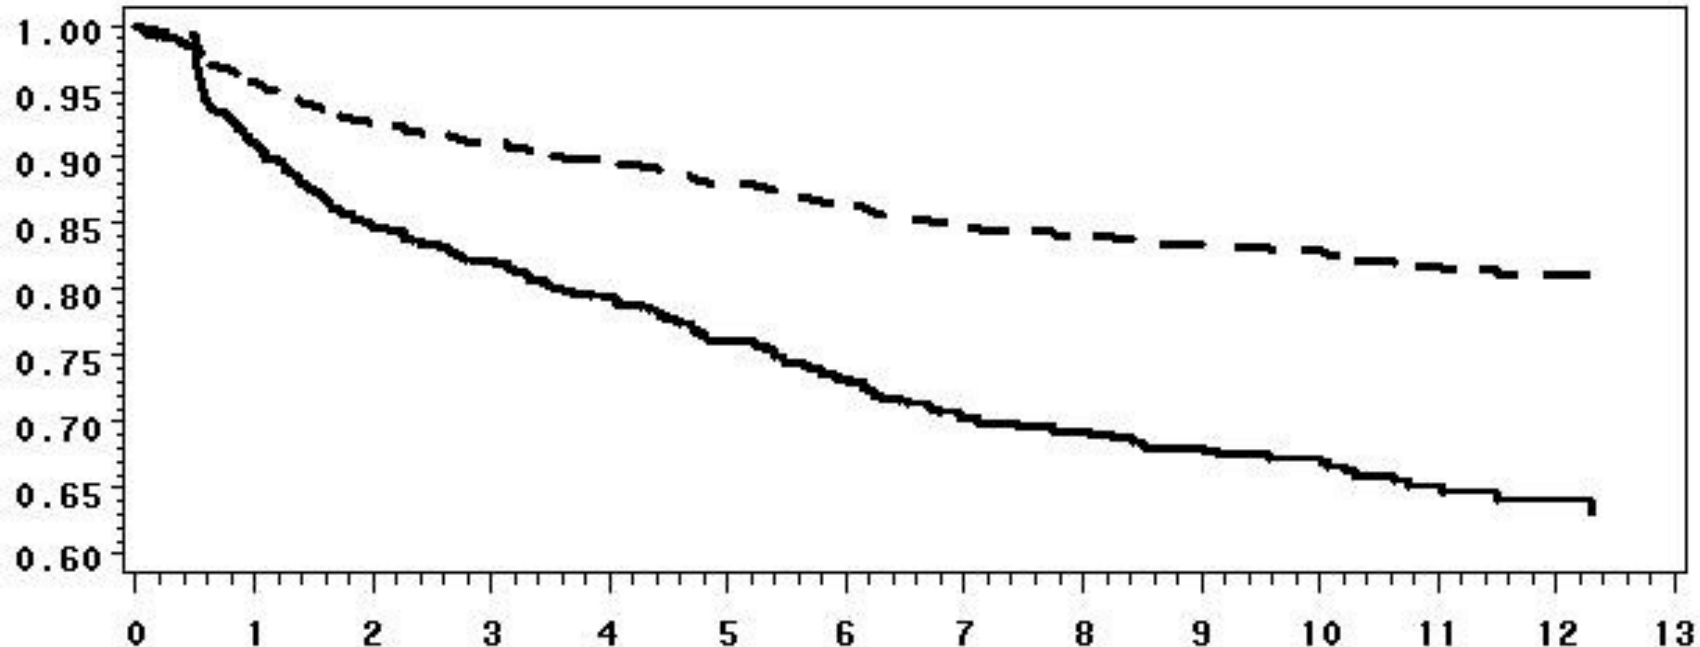

Total years of follow-up

—

No  
influenza  
vaccine

- -

At least one  
influenza vaccine

Supplement: MOESM2 [file 9442072]
